# Supplementary material
Source: publisher figshare collection journal article supplement (https://acs.figshare.com/ndownloader/files/27413563)
Supplement: Supplementary file 1 [file 27413563]

Supporting Information for

**Achieving low-voltage, high-mobility IGZO transistor  
through ALD-derived bi-layer channel and hafnia-based  
gate dielectric stack**

*Min Hoe Cho<sup>1</sup>, Cheol Hee Choi<sup>1</sup>, Hyeon Joo Seul<sup>1</sup>, Hyun Cheol Cho<sup>1</sup>, and Jae Kyeong Jeong<sup>\*,1</sup>*

<sup>1</sup>Department of Electronic Engineering, Hanyang University, Seoul 04763, South Korea

AUTHOR EMAIL ADDRESS: J. K. Jeong (jkjeong1@hanyang.ac.kr).

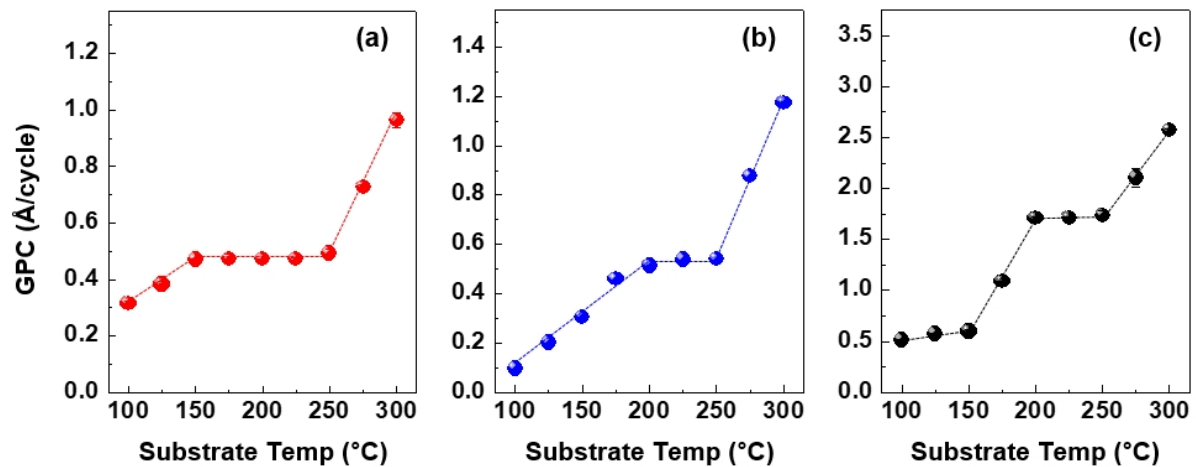

**Figure S1.** The growth rate per cycle (GPC) of (a)  $\text{In}_2\text{O}_3$ , (b)  $\text{Ga}_2\text{O}_3$ , and (c)  $\text{ZnO}$  as a function of substrate temperature.

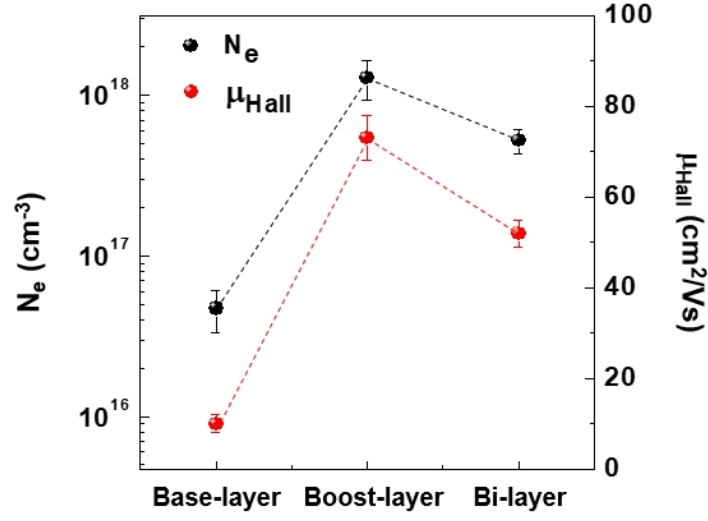

**Figure S2.** Carrier density ( $N_e$ ) and Hall mobility ( $\mu_{Hall}$ ) of the ALD-derived base layer, boost layer and bilayer IGZO thin films at  $T_A = 500$  °C on the glass substrate.

**Table S1.**  $N_e$  and  $\mu_{Hall}$  of the ALD-derived base layer, boost layer and bilayer IGZO thin films at  $T_A = 500$  °C on a glass substrate.

| Material                                                                                                                                      | $N_e$ [ $10^{17}/\text{cm}^3$ ] | $\mu_{Hall}$ [ $\text{cm}^2/(\text{V s})$ ] |
|-----------------------------------------------------------------------------------------------------------------------------------------------|---------------------------------|---------------------------------------------|
| In <sub>0.52</sub> Ga <sub>0.29</sub> Zn <sub>0.19</sub> O (13 nm), Base layer                                                                | $0.47 \pm 0.14$                 | $10 \pm 2$                                  |
| In <sub>0.82</sub> Ga <sub>0.08</sub> Zn <sub>0.10</sub> O (13 nm), Boost layer                                                               | $12.81 \pm 3.49$                | $73 \pm 5$                                  |
| In <sub>0.82</sub> Ga <sub>0.08</sub> Zn <sub>0.10</sub> O (3 nm)/In <sub>0.52</sub> Ga <sub>0.29</sub> Zn <sub>0.19</sub> O (10 nm), Bilayer | $5.24 \pm 0.91$                 | $52 \pm 3$                                  |

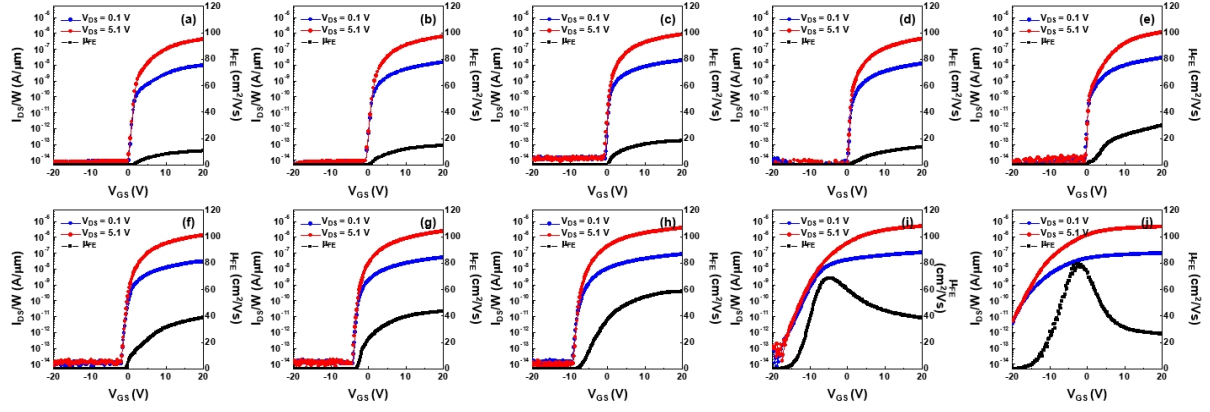

**Figure S3.** Representative transfer characteristics of ALD-derived IGZO bottom-gate structure TFT with 10 different cation compositions; (a)  $\text{In}_{0.42}\text{Ga}_{0.48}\text{Zn}_{0.10}\text{O}$ , (b)  $\text{In}_{0.47}\text{Ga}_{0.40}\text{Zn}_{0.13}\text{O}$ , (c)  $\text{In}_{0.52}\text{Ga}_{0.29}\text{Zn}_{0.19}\text{O}$ , (d)  $\text{In}_{0.28}\text{Ga}_{0.30}\text{Zn}_{0.42}\text{O}$ , (e)  $\text{In}_{0.32}\text{Ga}_{0.21}\text{Zn}_{0.47}\text{O}$ , (f)  $\text{In}_{0.42}\text{Ga}_{0.48}\text{Zn}_{0.10}\text{O}$ , (g)  $\text{In}_{0.42}\text{Ga}_{0.15}\text{Zn}_{0.43}\text{O}$ , (h)  $\text{In}_{0.54}\text{Ga}_{0.12}\text{Zn}_{0.34}\text{O}$ , (i)  $\text{In}_{0.67}\text{Ga}_{0.10}\text{Zn}_{0.22}\text{O}$ , and (j)  $\text{In}_{0.82}\text{Ga}_{0.08}\text{Zn}_{0.10}\text{O}$ . The devices were fabricated on the  $\text{SiO}_2/\text{Si}$  substrate where the thermal  $\text{SiO}_2$  and  $\text{p}^+\text{-Si}$  substrate act as the gate insulator and electrode, respectively.

**Table S2.** Summary of electrical parameters:  $\mu_{FE}$ ,  $SS$ ,  $V_{TH}$ , and  $I_{ON/OFF}$  of the ALD-derived IGZO bottom-gate structure TFTs with 10 different cation compositions.

| Channel | Gate Insulator        | Cation Composition [In:Ga:Zn, at%] | $\mu_{FE}$ [ $\text{cm}^2/(\text{V s})$ ] | $SS$ [V/dec] | $V_{TH}$ [V] | $I_{ON/OFF}$ [ $\times 10^7$ ] | Corresponding I-V curve in Fig. S2 |
|---------|-----------------------|------------------------------------|-------------------------------------------|--------------|--------------|--------------------------------|------------------------------------|
| IGZO    | 100 nm $\text{SiO}_2$ | 42:48:10                           | 10.6                                      | 0.37         | 1.58         | $\sim 5.4$                     | (a)                                |
|         |                       | 47:40:13                           | 14.5                                      | 0.40         | 1.05         | $\sim 7.2$                     | (b)                                |
|         |                       | 52:29:19                           | 18.2                                      | 0.43         | 0.57         | $\sim 8.3$                     | (c)                                |
|         |                       | 28:30:42                           | 13.7                                      | 0.34         | 1.35         | $\sim 6.8$                     | (d)                                |
|         |                       | 32:21:47                           | 29.8                                      | 0.42         | 0.92         | $\sim 13.3$                    | (e)                                |
|         |                       | 38:18:44                           | 38.5                                      | 0.52         | -0.24        | $\sim 17.7$                    | (f)                                |
|         |                       | 42:15:43                           | 43.5                                      | 0.60         | -2.69        | $\sim 19.5$                    | (g)                                |
|         |                       | 54:12:34                           | 58.6                                      | 0.71         | -7.32        | $\sim 31.2$                    | (h)                                |
|         |                       | 67:10:22                           | 68.7                                      | 1.72         | -11.68       | $\sim 3.8$                     | (i)                                |
|         |                       | 82:8:10                            | 79.4                                      | 2.63         | -16.44       | $\sim 0.01$                    | (j)                                |

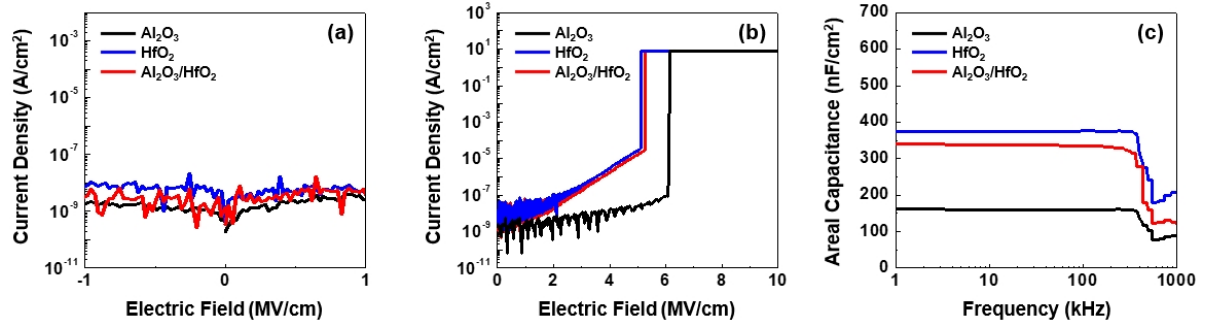

**Figure S4.** Electrical characteristics of the ALD-derived high- $\kappa$  dielectric film with an Al<sub>2</sub>O<sub>3</sub> (50 nm), HfO<sub>2</sub> (50 nm) and Al<sub>2</sub>O<sub>3</sub> (4 nm)/HfO<sub>2</sub> (50 nm) stack: (a) leakage current density ( $J_g$ ), (b) breakdown field ( $E_{br}$ ), and (c) frequency-dependent areal capacitance.

The leakage current density ( $J_g$ ), critical breakdown field ( $E_{br}$ ) and dielectric constant ( $\kappa$ ) of the MIM capacitors with different ALD-derived high- $\kappa$  dielectric films were measured to evaluate their suitability as a gate insulator for IGZO TFTs. The fabricated MIM capacitors were subjected to PDA at 400°C in a vacuum ambient. **Figure S4a** shows the variations of the leakage current density ( $J_g$ ) as a function of the applied electric field ( $E$ ), which was thickness-normalized for better comparison. The capacitor with an Al<sub>2</sub>O<sub>3</sub> film had a  $J_g$  value of  $2.37 \times 10^{-9}$  A/cm<sup>2</sup> at 1 MV/cm. The  $J_g$  value slightly increased to  $5.55 \times 10^{-9}$  A/cm<sup>2</sup> for the capacitor with the HfO<sub>2</sub> film. This phenomenon can be attributed to the existence of the grain boundary defects in HfO<sub>2</sub> as a leakage current path (**Figure S10**). Since the IGZO/HfO<sub>2</sub> interface is known to be inferior to the IGZO/SiO<sub>2</sub> and IGZO/Al<sub>2</sub>O<sub>3</sub>, the 4-nm-thick Al<sub>2</sub>O<sub>3</sub> film was inserted as the interface stabilizer. The capacitor with an Al<sub>2</sub>O<sub>3</sub>/HfO<sub>2</sub> dielectric stack film had a  $J_g$  value of  $3.59 \times 10^{-9}$  A/cm<sup>2</sup>, which is an intermediate value between the  $J_g$  value of Al<sub>2</sub>O<sub>3</sub> and HfO<sub>2</sub> film, indicating that the inserted Al<sub>2</sub>O<sub>3</sub> thin film can suppress the leakage current. The  $E_{br}$  value, which is defined as the electric field yielding a rapid increase up to the compliance limit, is also shown in **Figure S4b**. The  $E_{br}$  value for the different ALD-derived high- $\kappa$  dielectric films shows the same trend as the  $J_g$  value. **Figure S4c** shows the variations in the areal capacitance value as a function of applied frequency for the MIM capacitors with different ALD-derived high- $\kappa$  dielectric films. The areal capacitance values of the MIM capacitors with the Al<sub>2</sub>O<sub>3</sub>, HfO<sub>2</sub>, and Al<sub>2</sub>O<sub>3</sub>/HfO<sub>2</sub> dielectric stack films were 175.1, 375.8, and 334.9 nF/cm<sup>2</sup> at 100 kHz, respectively. From these values, the  $\kappa$  values were calculated to be 9, 21, and 20, respectively. It is evident that the Al<sub>2</sub>O<sub>3</sub>/HfO<sub>2</sub> dielectric stack film with the inserted 4-nm-thick Al<sub>2</sub>O<sub>3</sub> thin layer had better  $J_g$  and  $E_{br}$  values compared to the HfO<sub>2</sub> only capacitor, whereas  $\kappa$  values of 20 were obtained that are comparable to that of the HfO<sub>2</sub> only capacitor.

The  $J_g$ ,  $E_{br}$ , and  $\kappa$  values for different ALD-derived high- $\kappa$  dielectric films are summarized in **Table S3**.

**Table S3.** Summary of electrical parameters: leakage current density ( $J_g$ ), critical breakdown field ( $E_{br}$ ), areal capacitance ( $C_{ox}$ ), and  $\kappa$  values of the ALD-derived high- $\kappa$  dielectric films.

| Material                                         | Thickness<br>[nm]                                                            | $J_g$<br>[A/cm <sup>2</sup> ]<br>(@ 1 MV/cm) | $E_{br}$<br>[MV/cm] | $C_{ox}$<br>[nF/cm <sup>2</sup> ]<br>(@ 100 kHz) | $\kappa$<br>(@ 100 kHz) |
|--------------------------------------------------|------------------------------------------------------------------------------|----------------------------------------------|---------------------|--------------------------------------------------|-------------------------|
| Al <sub>2</sub> O <sub>3</sub>                   | 50                                                                           | $2.37 \times 10^{-9}$                        | 6.1                 | 159.31                                           | ~ 9                     |
| HfO <sub>2</sub>                                 | 50                                                                           | $5.55 \times 10^{-9}$                        | 5.1                 | 375.80                                           | ~ 21                    |
| Al <sub>2</sub> O <sub>3</sub> /HfO <sub>2</sub> | <sup>54</sup><br>(Al <sub>2</sub> O <sub>3</sub> = 4, HfO <sub>2</sub> = 50) | $3.59 \times 10^{-9}$                        | 5.3                 | 334.91                                           | ~ 20                    |

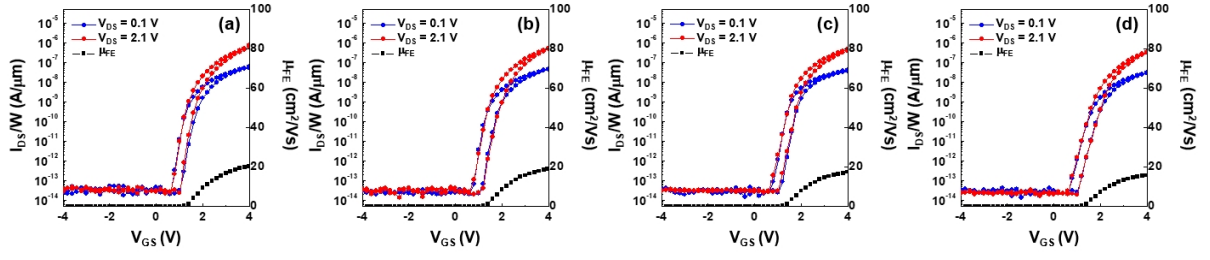

**Figure S5.** Representative transfer characteristics of the base layer IGZO TFTs with different thicknesses of HfO<sub>2</sub> as a gate insulator; (a) 60, (b) 70, (c) 80, and (d) 90 nm.

**Table S4.** Summary of electrical parameters:  $\mu_{FE}$ ,  $SS$ ,  $V_{TH}$ ,  $I_{ON/OFF}$ , and  $N_{T,max}$  of the base layer IGZO TFTs with different thickness of HfO<sub>2</sub> as a gate insulator.

| Channel                                                                 | Gate Insulator.        | $C_{OX}$ [nF/cm <sup>2</sup> ] | $\mu_{FE}$ [cm <sup>2</sup> /(V s)] | $SS$ [V/dec]    | $V_{TH}$ [V]    | $I_{ON/OFF}$ [ $\times 10^7$ ] | $N_{T,max}$ [cm <sup>-3</sup> ev <sup>-1</sup> ] |
|-------------------------------------------------------------------------|------------------------|--------------------------------|-------------------------------------|-----------------|-----------------|--------------------------------|--------------------------------------------------|
| In <sub>0.52</sub> Ga <sub>0.29</sub> Zn <sub>0.19</sub> O (Base layer) | 60 nm HfO <sub>2</sub> | 313                            | 20.5 $\pm$ 0.38                     | 0.15 $\pm$ 0.01 | 1.27 $\pm$ 0.25 | ~ 2.2                          | 3.96 $\times 10^{18}$                            |
|                                                                         | 70 nm HfO <sub>2</sub> | 269                            | 18.9 $\pm$ 0.45                     | 0.17 $\pm$ 0.02 | 1.38 $\pm$ 0.31 | ~ 1.5                          | 3.97 $\times 10^{18}$                            |
|                                                                         | 80 nm HfO <sub>2</sub> | 234                            | 17.4 $\pm$ 0.56                     | 0.20 $\pm$ 0.02 | 1.47 $\pm$ 0.29 | ~ 1.4                          | 3.96 $\times 10^{18}$                            |
|                                                                         | 90 nm HfO <sub>2</sub> | 208                            | 15.6 $\pm$ 0.31                     | 0.24 $\pm$ 0.01 | 1.61 $\pm$ 0.21 | ~ 1.2                          | 4.00 $\times 10^{18}$                            |

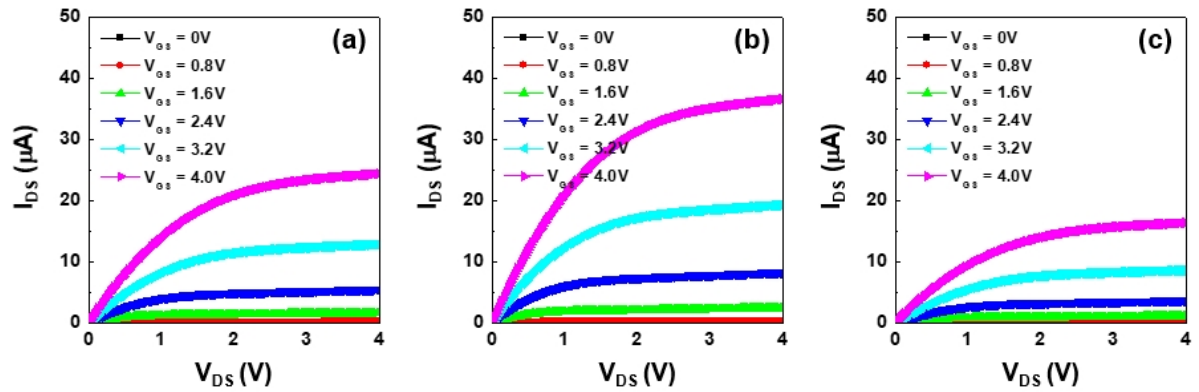

**Figure S6.** Corresponding output characteristics of the base layer IGZO TFT with different gate insulators of (a) HfO<sub>2</sub> (100 nm), (b) HfO<sub>2</sub> (50 nm), and (c) Al<sub>2</sub>O<sub>3</sub> (50 nm).

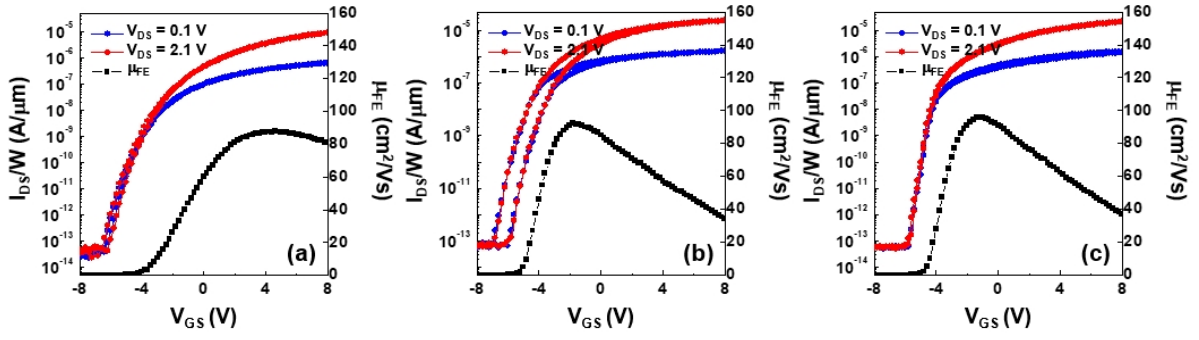

**Figure S7.** Representative transfer characteristics of the boost layer IGZO TFTs with different gate insulators of (a) Al<sub>2</sub>O<sub>3</sub> (50 nm), (b) HfO<sub>2</sub> (50 nm), and (c) Al<sub>2</sub>O<sub>3</sub> (4 nm)/ HfO<sub>2</sub> (50 nm).

**Table S5.** Summary of electrical parameters:  $\mu_{FE}$ ,  $SS$ ,  $V_{TH}$ ,  $I_{ON/OFF}$ , and  $N_{T,max}$  for the boost layer IGZO TFTs with different gate insulators of (a) Al<sub>2</sub>O<sub>3</sub> (50-nm), (b) HfO<sub>2</sub> (50-nm), and (c) Al<sub>2</sub>O<sub>3</sub> (4-nm)/ HfO<sub>2</sub> (50-nm).

| Channel                                                                     | Gate Insulator                                         | $C_{OX}$<br>[nF/cm <sup>2</sup> ] | $\mu_{FE}$<br>[cm <sup>2</sup> /(V s)] | $SS$<br>[V/dec] | $V_{TH}$<br>[V]  | $I_{ON/OFF}$<br>[ $\times 10^7$ ] | $N_{T,max}$<br>[cm <sup>-3</sup> ev <sup>-1</sup> ] |
|-----------------------------------------------------------------------------|--------------------------------------------------------|-----------------------------------|----------------------------------------|-----------------|------------------|-----------------------------------|-----------------------------------------------------|
| In <sub>0.82</sub> Ga <sub>0.08</sub> Zn <sub>0.10</sub> O<br>(Boost layer) | 50 nm Al <sub>2</sub> O <sub>3</sub>                   | 159                               | 87.8 $\pm$ 0.73                        | 0.63 $\pm$ 0.02 | -4.36 $\pm$ 0.22 | ~ 17.8                            | 8.08 $\times 10^{18}$                               |
|                                                                             | 50 nm HfO <sub>2</sub>                                 | 376                               | 92.3 $\pm$ 0.73                        | 0.36 $\pm$ 0.03 | -5.58 $\pm$ 0.28 | ~ 35.0                            | 10.9 $\times 10^{18}$                               |
|                                                                             | 54 nm Al <sub>2</sub> O <sub>3</sub> /HfO <sub>2</sub> | 335                               | 95.7 $\pm$ 0.66                        | 0.30 $\pm$ 0.02 | -4.84 $\pm$ 0.14 | ~ 37.4                            | 8.10 $\times 10^{18}$                               |

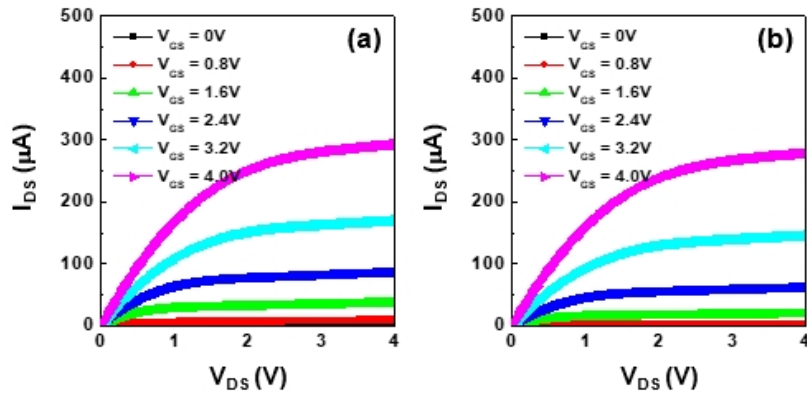

**Figure S8.** Corresponding output characteristics of the bilayer IGZO TFTs with different gate insulators of (a) HfO<sub>2</sub> (50 nm) and (b) Al<sub>2</sub>O<sub>3</sub> (4 nm)/ HfO<sub>2</sub> (50 nm).



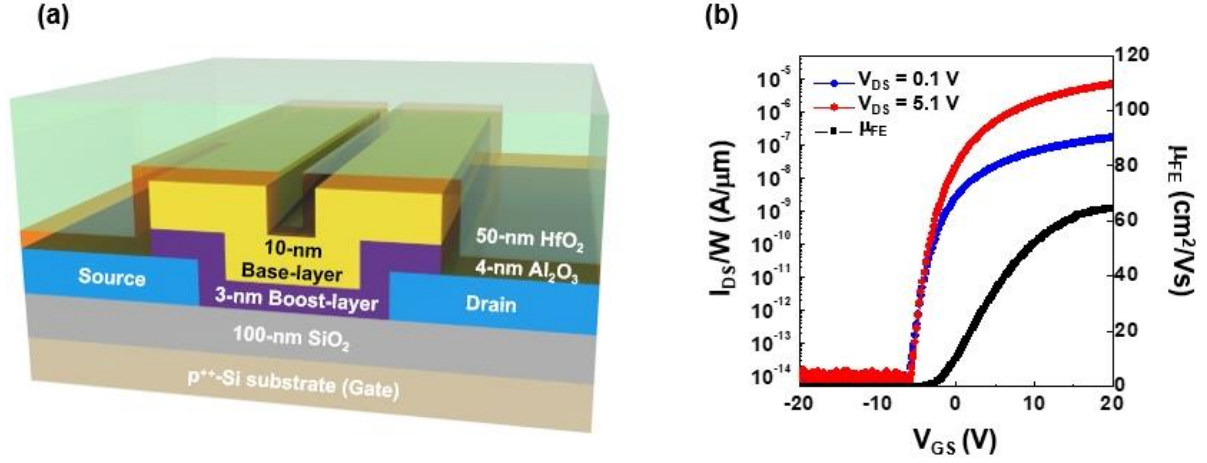

**Figure S9.** (a) Schematic diagram of the bottom gate structure bilayer IGZO TFT with gate insulator of SiO<sub>2</sub> (100 nm) and (b) corresponding transfer characteristic. The device went through PDA at 500°C for 1h in air ambient.

**Table S6.** Summary of electrical parameters:  $\mu_{FE}$ ,  $SS$ , and  $V_{TH}$ , and  $I_{ON/OFF}$  of the bilayer IGZO TFT with gate insulator of SiO<sub>2</sub> (100 nm) through PDA at 500°C for 1h in air ambient.

| Channel                                                              | Gate Insulator          | $C_{OX}$<br>[nF/cm <sup>2</sup> ] | $\mu_{FE}$<br>[cm <sup>2</sup> /(V s)] | $SS$<br>[V/dec] | $V_{TH}$<br>[V]  | $I_{ON/OFF}$<br>[ $\times 10^7$ ] | $N_{T,max}$<br>[cm <sup>-3</sup> ev <sup>-1</sup> ] |
|----------------------------------------------------------------------|-------------------------|-----------------------------------|----------------------------------------|-----------------|------------------|-----------------------------------|-----------------------------------------------------|
| In <sub>0.60</sub> Ga <sub>0.21</sub> Zn <sub>0.19</sub> O (Bilayer) | 100 nm SiO <sub>2</sub> | 34.5                              | 64.6 $\pm$ 1.21                        | 0.79 $\pm$ 0.01 | -3.80 $\pm$ 1.02 | $\sim$ 22.1                       | 2.21 $\times 10^{18}$                               |

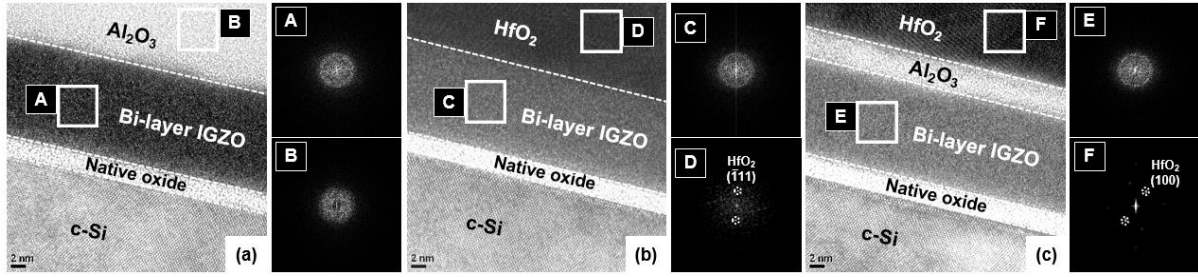

**Figure S10.** Cross-sectional HRTEM images of (a) Al<sub>2</sub>O<sub>3</sub>/bilayer IGZO, (b) HfO<sub>2</sub>/bilayer IGZO and (c) HfO<sub>2</sub>/Al<sub>2</sub>O<sub>3</sub>/bilayer IGZO. Fast Fourier transform (FFT) patterns of the selected area in IGZO film are inserted in the given TEM images.

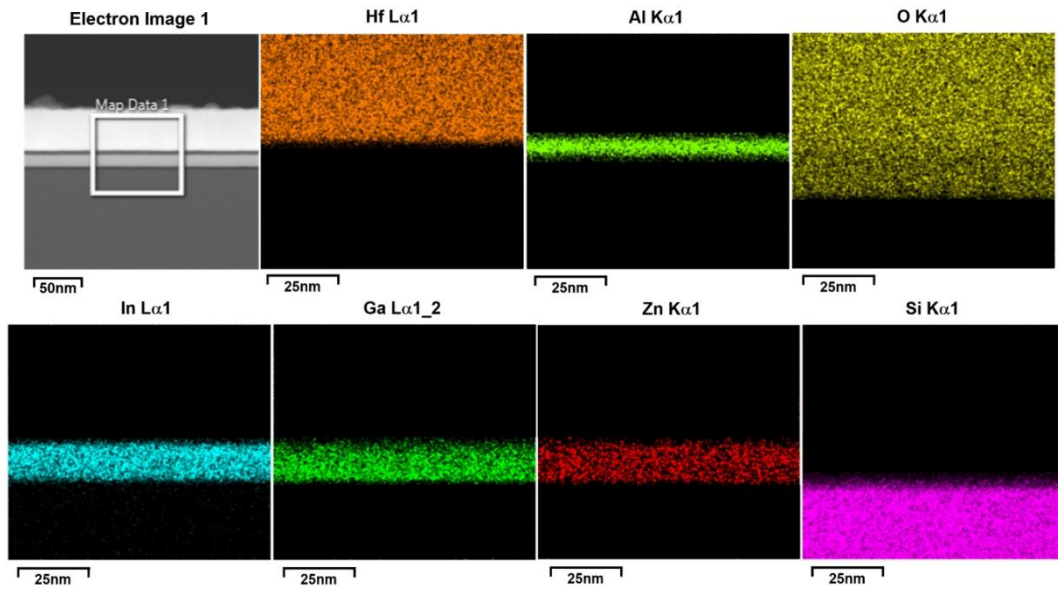

**Figure S11.** Elemental distributions of the HfO<sub>2</sub>/Al<sub>2</sub>O<sub>3</sub>/bilayer IGZO stack by energy dispersive spectroscopy (EDS) mapping.

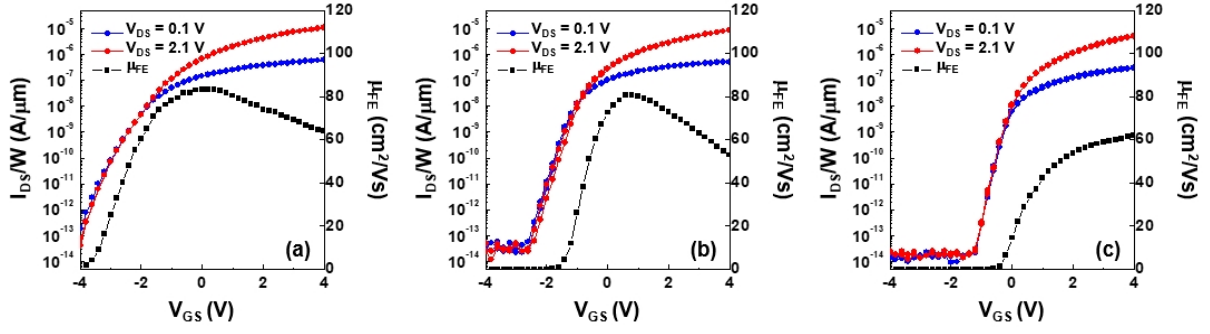

**Figure S12.** Representative transfer characteristics of the bilayer IGZO TFT with gate insulator of Al<sub>2</sub>O<sub>3</sub> (4 nm)/HfO<sub>2</sub> (50 nm) stack varying PDA conditions; PDA at (a) 300°C, (b) 400°C for 1h in air, and (c) 400°C for 1h in O<sub>2</sub> ambient.

**Table S7.** Summary of electrical parameters:  $\mu_{FE}$ ,  $SS$ ,  $V_{TH}$ , and  $I_{ON/OFF}$ , and  $N_{T,max}$  of the bilayer IGZO TFTs with gate insulator of Al<sub>2</sub>O<sub>3</sub> (4 nm)/HfO<sub>2</sub> (50 nm) with varying PDA conditions.

| Channel                                                              | Gate Insulator                                         | PDA Condition                 | $\mu_{FE}$ [cm <sup>2</sup> /(V s)] | $SS$ [V/dec]    | $V_{TH}$ [V]     | $I_{ON/OFF}$ [ $\times 10^7$ ] | $N_{T,max}$ [cm <sup>-3</sup> ev <sup>-1</sup> ] |
|----------------------------------------------------------------------|--------------------------------------------------------|-------------------------------|-------------------------------------|-----------------|------------------|--------------------------------|--------------------------------------------------|
| In <sub>0.60</sub> Ga <sub>0.21</sub> Zn <sub>0.19</sub> O (Bilayer) | 54 nm Al <sub>2</sub> O <sub>3</sub> /HfO <sub>2</sub> | 300°C<br>1h in air            | 83.5 $\pm$ 1.03                     | 0.46 $\pm$ 0.02 | -2.64 $\pm$ 0.67 | ~ 26.6                         | 12.4 $\times 10^{18}$                            |
|                                                                      |                                                        | 400°C<br>1h in air            | 80.8 $\pm$ 0.86                     | 0.30 $\pm$ 0.02 | -1.49 $\pm$ 0.42 | ~ 24.8                         | 8.10 $\times 10^{18}$                            |
|                                                                      |                                                        | 400°C<br>1h in O <sub>2</sub> | 61.9 $\pm$ 1.25                     | 0.20 $\pm$ 0.01 | -0.38 $\pm$ 0.14 | ~ 21.7                         | 5.40 $\times 10^{18}$                            |

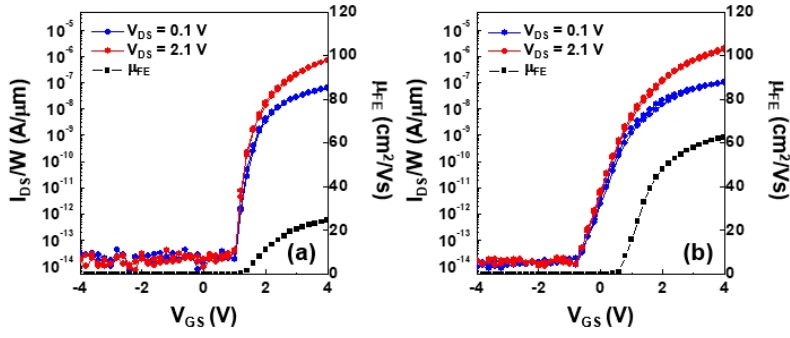

**Figure S13.** Representative transfer characteristics of the (a) base layer IGZO TFTs with the  $\text{Al}_2\text{O}_3$  (4 nm)/ $\text{HfO}_2$  (50 nm) gate insulator and (b) bilayer IGZO TFTs with a  $\text{Al}_2\text{O}_3$  (50 nm) gate insulator.

**Table S8.** Summary of electrical parameters:  $\mu_{FE}$ ,  $SS$ ,  $V_{TH}$ ,  $I_{ON/OFF}$ , and  $N_{T,max}$  of the base layer IGZO TFTs with the  $\text{Al}_2\text{O}_3$  (4 nm)/ $\text{HfO}_2$  (50 nm) and bilayer IGZO TFTs with  $\text{Al}_2\text{O}_3$  (50 nm) gate insulator.

| Channel                                                                    | Gate Insulator                                | $C_{OX}$<br>[nF/cm <sup>2</sup> ] | $\mu_{FE}$<br>[cm <sup>2</sup> /(V s)] | $SS$<br>[V/decade] | $V_{TH}$<br>[V] | $I_{ON/OFF}$<br>[ $\times 10^7$ ] | $N_{T,max}$<br>[cm <sup>-3</sup> ev <sup>-1</sup> ] |
|----------------------------------------------------------------------------|-----------------------------------------------|-----------------------------------|----------------------------------------|--------------------|-----------------|-----------------------------------|-----------------------------------------------------|
| $\text{In}_{0.52}\text{Ga}_{0.29}\text{Zn}_{0.19}\text{O}$<br>(Base layer) | 54 nm<br>$\text{Al}_2\text{O}_3/\text{HfO}_2$ | 335                               | $24.5 \pm 0.58$                        | $0.10 \pm 0.01$    | $1.52 \pm 0.27$ | $\sim 3.8$                        | $2.70 \times 10^{18}$                               |
| $\text{In}_{0.60}\text{Ga}_{0.21}\text{Zn}_{0.19}\text{O}$<br>(Bilayer)    | 50 nm<br>$\text{Al}_2\text{O}_3$              | 159                               | $62.7 \pm 0.81$                        | $0.27 \pm 0.02$    | $0.74 \pm 0.13$ | $\sim 11.3$                       | $3.46 \times 10^{18}$                               |

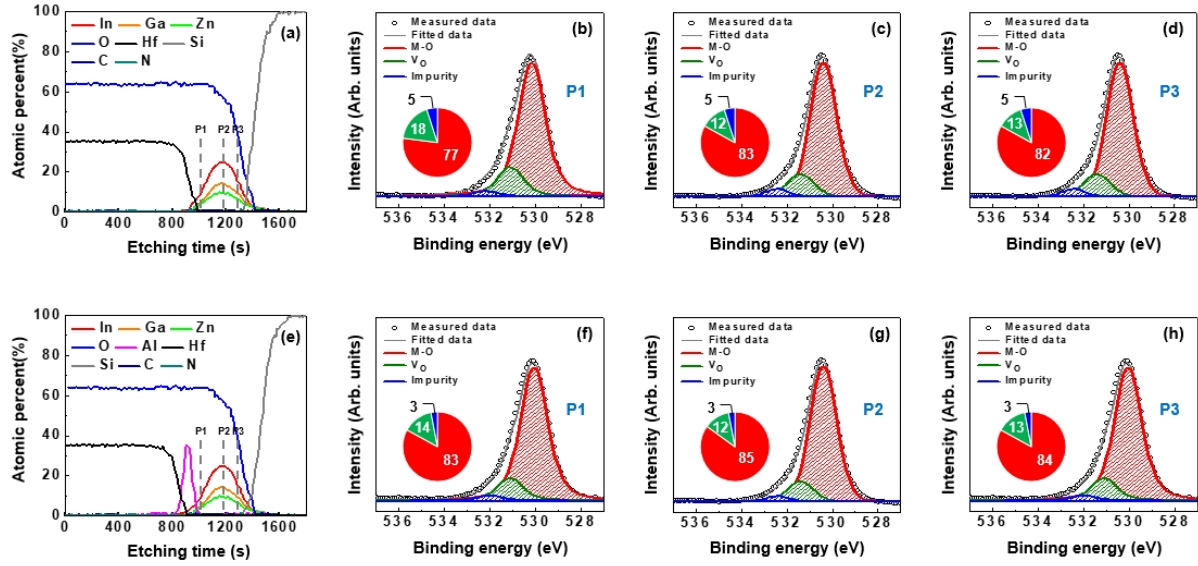

**Figure S14.** XPS depth profile of the base layer IGZO film with different high- $\kappa$  dielectric stacks and  $O 1s$  spectra: (a) XPS depth profile of the  $HfO_2$ /base layer IGZO stack.  $O 1s$  spectra taken from (b) P1, (c) P2, and (d) P3 position for the  $HfO_2$ /base layer IGZO stack. (e) XPS depth profile of the  $HfO_2/Al_2O_3$ /base layer IGZO stack.  $O 1s$  spectra from (f) P1, (g) P2, and (h) P3 positions for the  $HfO_2/Al_2O_3$ /base layer IGZO stack.

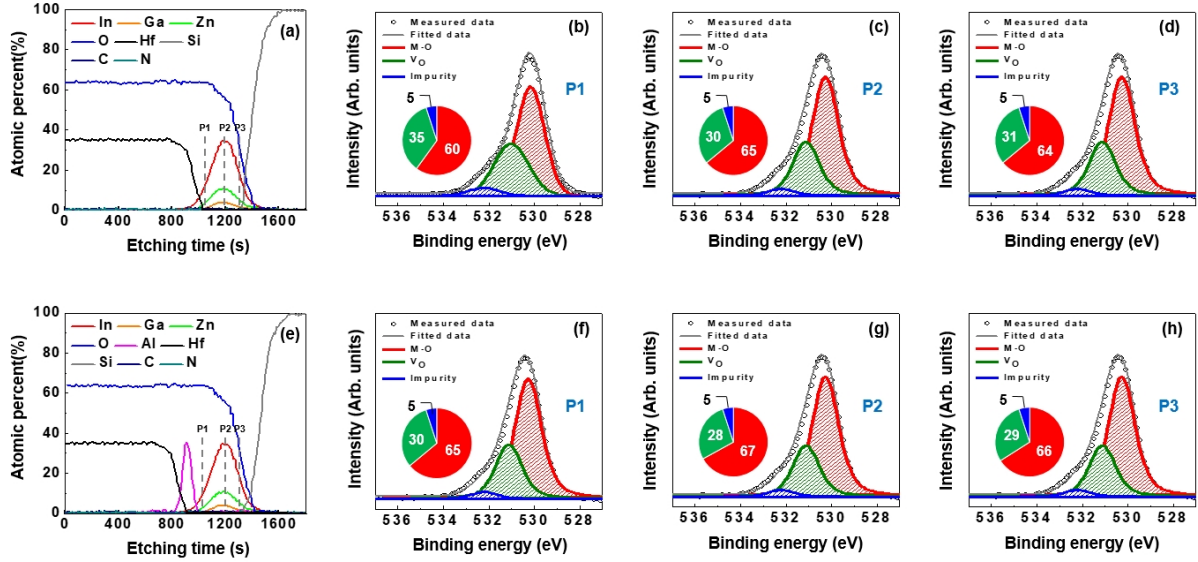

**Figure S15.** XPS depth profile of the boost layer IGZO film with different high- $\kappa$  dielectric stacks and  $O 1s$  spectra: (a) XPS depth profile of the  $HfO_2$ /boost layer IGZO stack.  $O 1s$  spectra taken from (b) P1, (c) P2, and (d) P3 position for the  $HfO_2$ /boost layer IGZO stack. (e) XPS depth profile of the  $HfO_2/Al_2O_3$ /boost layer IGZO stack.  $O 1s$  spectra from (f) P1, (g) P2, and (h) P3 position for the  $HfO_2/Al_2O_3$ /boost layer IGZO stack.

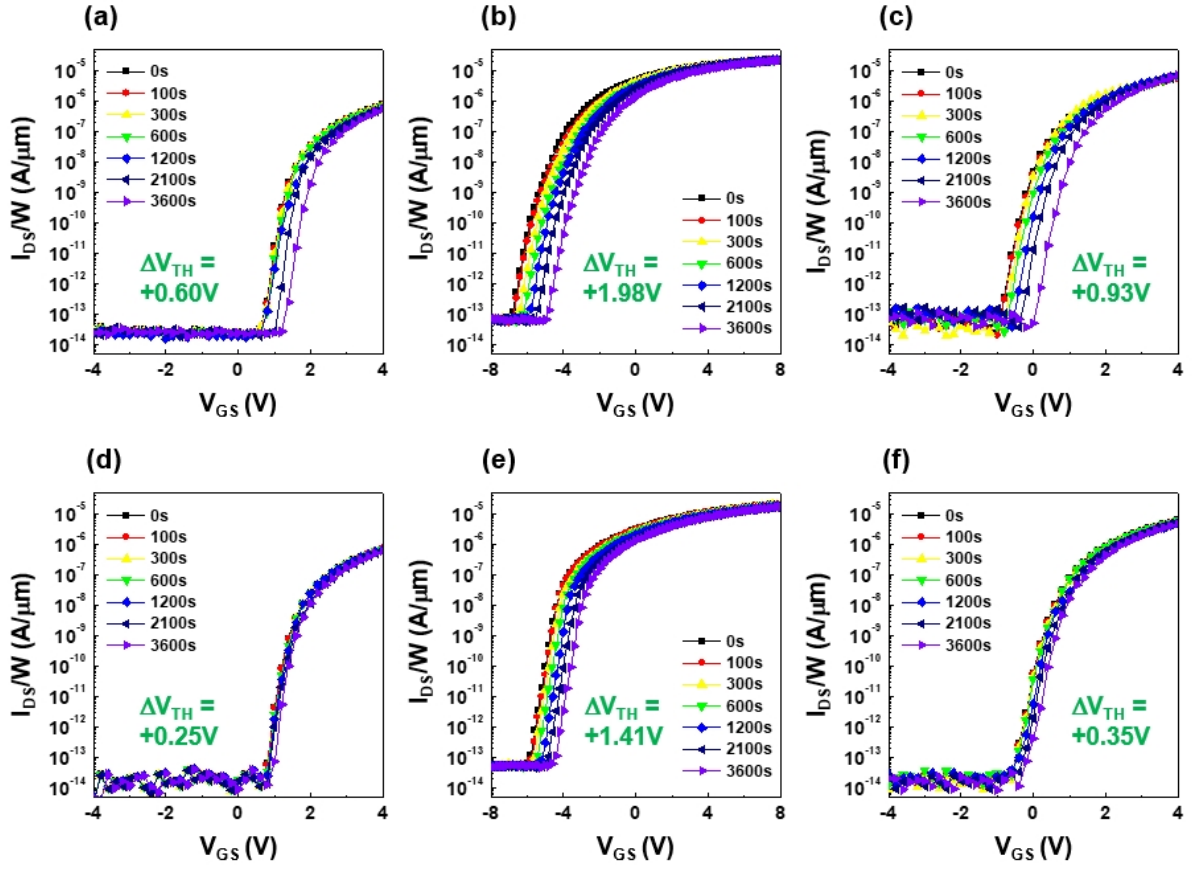

**Figure S16.** Evolution of time-dependent transfer characteristics of ALD-derived IGZO TFTs with various gate insulator; (a,d) base layer IGZO TFTs with (a)  $\text{HfO}_2$  and (d)  $\text{Al}_2\text{O}_3/\text{HfO}_2$ , (b,e) boost layer IGZO TFTs with (b)  $\text{HfO}_2$  and (e)  $\text{Al}_2\text{O}_3/\text{HfO}_2$ , (c,f) bilayer IGZO TFTs with (c)  $\text{HfO}_2$  and (f)  $\text{Al}_2\text{O}_3/\text{HfO}_2$ . The stress conditions are  $V_{GS} = V_{TH} + 10\text{V}$  at  $60^\circ\text{C}$ .



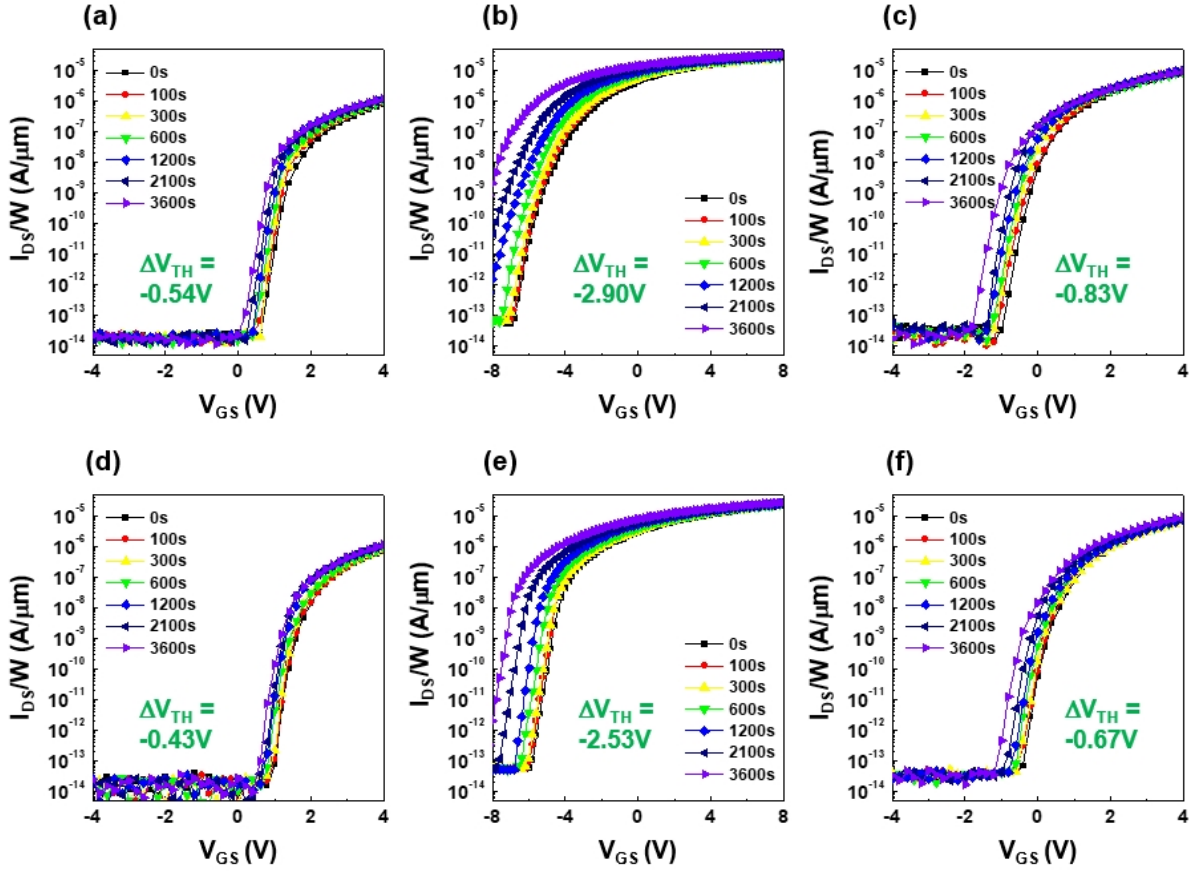

**Figure S17.** Evolution of time-dependent transfer characteristics of ALD-derived IGZO TFTs with various gate insulator; (a,d) base layer IGZO TFTs with (a)  $\text{HfO}_2$  and (d)  $\text{Al}_2\text{O}_3/\text{HfO}_2$ , (b,e) boost layer IGZO TFTs with (b)  $\text{HfO}_2$  and (e)  $\text{Al}_2\text{O}_3/\text{HfO}_2$ , (c,f) bilayer IGZO TFTs with (c)  $\text{HfO}_2$  and (f)  $\text{Al}_2\text{O}_3/\text{HfO}_2$ . The stress conditions are  $V_{GS} = V_{TH} - 10\text{V}$  and a light intensity of  $0.066\text{mW}/\text{cm}^2$  (light source with a wavelength of  $\sim 533\text{ nm}$  with full-width at half maximum of approximately  $\pm 10\text{ nm}$ ).

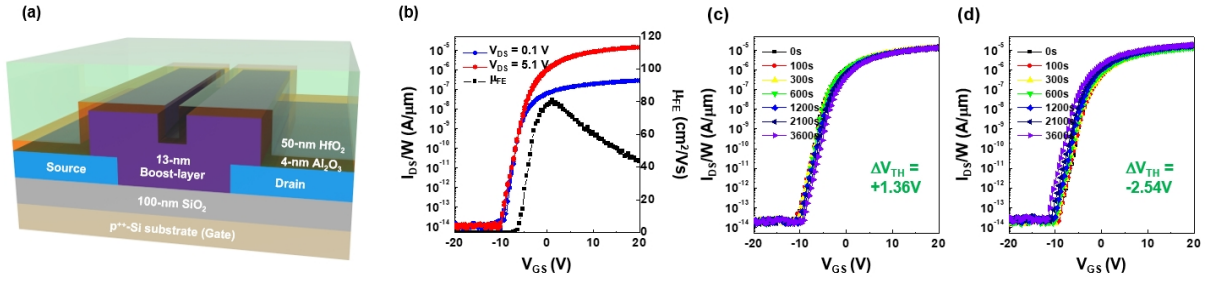

**Figure S18.** (a) Schematic diagram of the bottom gate structure boost layer IGZO TFT with SiO<sub>2</sub> (100 nm) gate insulator and (b) corresponding transfer characteristics. (c,d) Evolution of time-dependent transfer characteristics of bottom gate structure boost layer IGZO TFT with SiO<sub>2</sub> (100 nm) gate insulator under (c) PBTS and (b) NBIS conditions for 3,600 sec.

**Table S9.** Summary of electrical parameters:  $\mu_{FE}$ ,  $SS$ , and  $V_{TH}$ , and  $I_{ON/OFF}$  of the boost layer IGZO TFT with SiO<sub>2</sub> (100 nm) gate insulator through PDA at 500°C for 1h in air ambient.

| Channel                                                                     | Gate Insulator             | $C_{OX}$<br>[nF/cm <sup>2</sup> ] | $\mu_{FE}$<br>[cm <sup>2</sup> /(V s)] | $SS$<br>[V/dec] | $V_{TH}$<br>[V]  | $I_{ON/OFF}$<br>[ $\times 10^7$ ] | $N_{T,max}$<br>[cm <sup>-3</sup> ev <sup>-1</sup> ] |
|-----------------------------------------------------------------------------|----------------------------|-----------------------------------|----------------------------------------|-----------------|------------------|-----------------------------------|-----------------------------------------------------|
| In <sub>0.82</sub> Ga <sub>0.08</sub> Zn <sub>0.10</sub> O<br>(Boost layer) | 100 nm<br>SiO <sub>2</sub> | 34.5                              | 81.3 $\pm$ 4.04                        | 0.97 $\pm$ 0.02 | -6.08 $\pm$ 2.16 | $\sim$ 29.4                       | 2.70 $\times 10^{18}$                               |



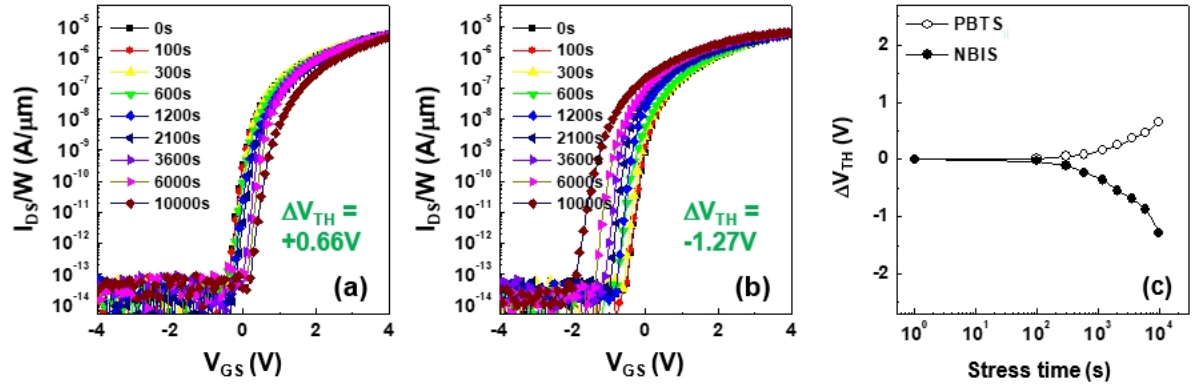

**Figure S19.** Variations in the transfer characteristics for the bilayer IGZO TFT with gate insulator of Al<sub>2</sub>O<sub>3</sub> (4 nm)/HfO<sub>2</sub> (50 nm) stack under (a) PBTs and (b) NBIS conditions for 10,000 sec. (c) Corresponding  $V_{TH}$  shift as a function of the stress time.

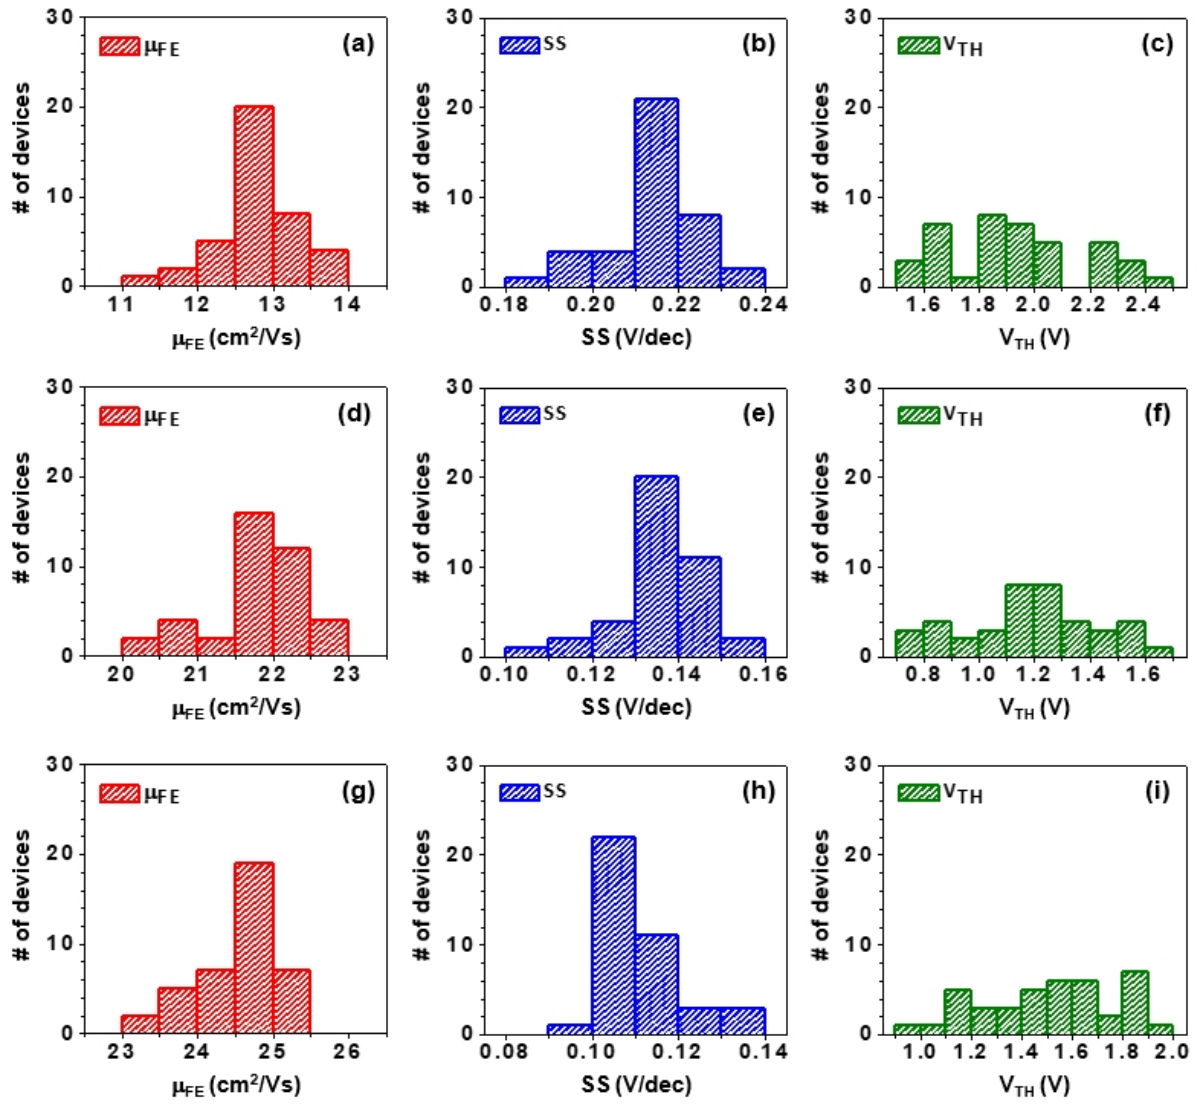

**Figure S20.** Distribution of (a, d, g)  $\mu_{FE}$ , (b, e, h) SS, and (c, f, i)  $V_{TH}$  for the base layer IGZO TFTs with (a-c)  $\text{Al}_2\text{O}_3$ , (e-f)  $\text{HfO}_2$ , and (g-i)  $\text{Al}_2\text{O}_3/\text{HfO}_2$  gate insulator. These data were for 40 different transistors.

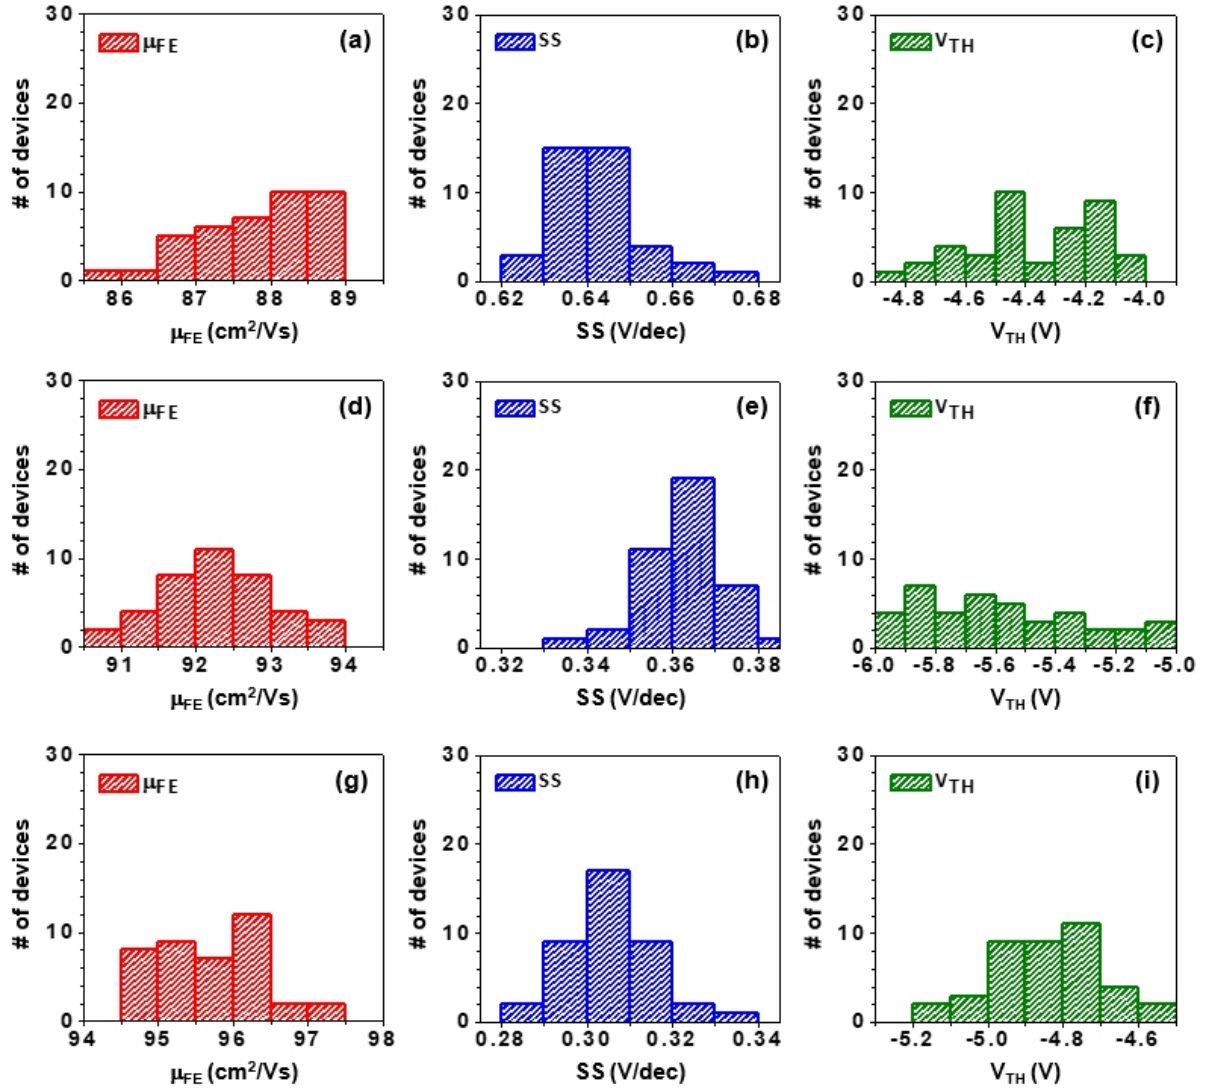

**Figure S21.** Distribution of (a, d, g)  $\mu_{FE}$ , (b, e, h) SS, and (c, f, i)  $V_{TH}$  for the boost layer IGZO TFTs with (a-c)  $\text{Al}_2\text{O}_3$ , (e-f)  $\text{HfO}_2$ , and (g-i)  $\text{Al}_2\text{O}_3/\text{HfO}_2$  gate insulator. These data were for 40 different transistors.

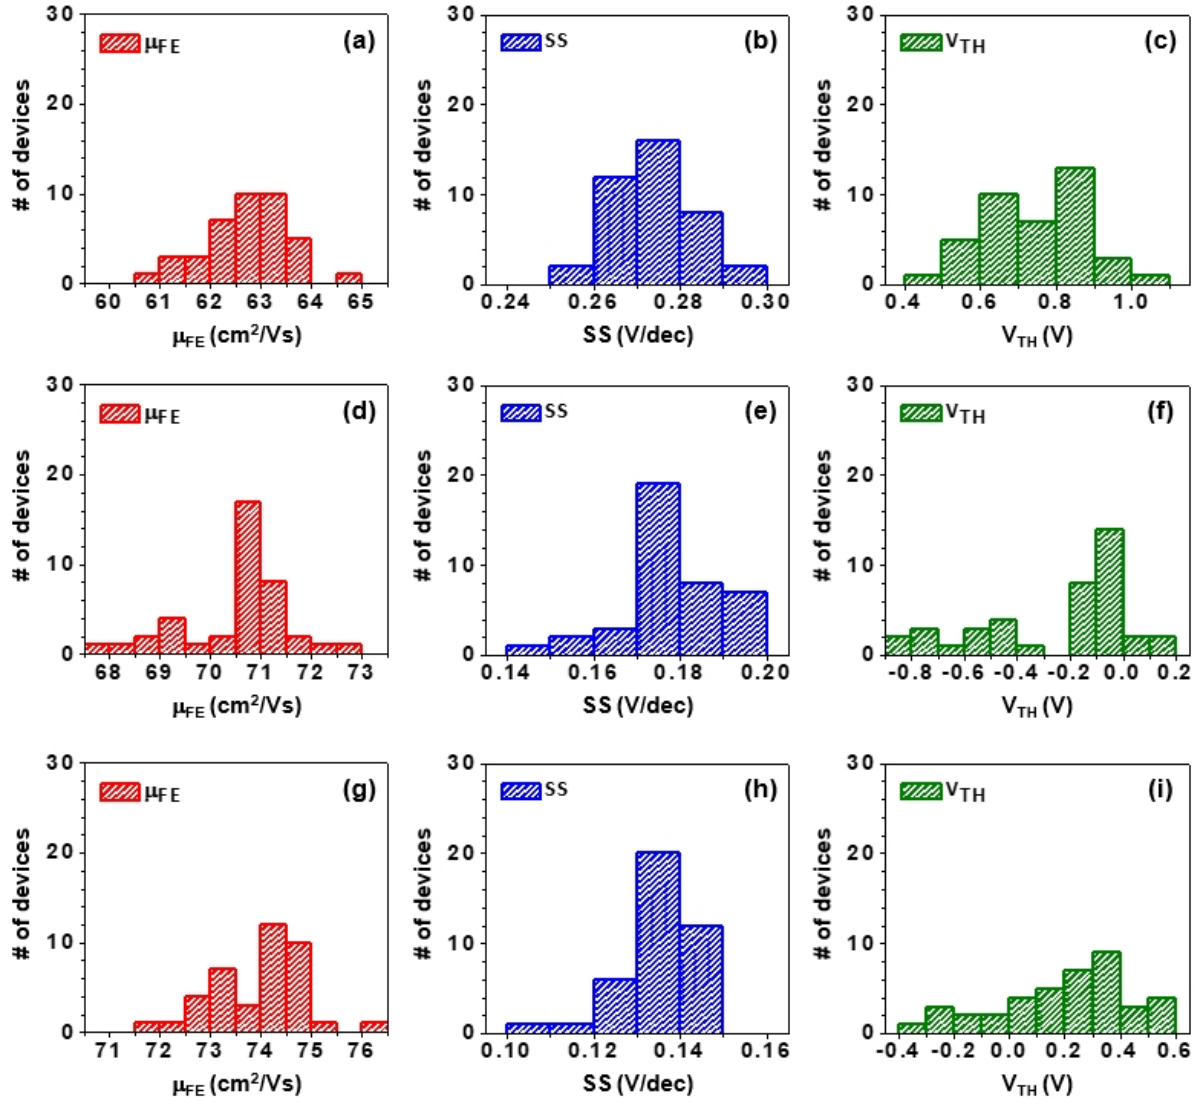

**Figure S22.** Distribution of (a, d, g)  $\mu_{FE}$ , (b, e, h) SS, and (c, f, i)  $V_{TH}$  for the bilayer IGZO TFTs with (a-c) Al<sub>2</sub>O<sub>3</sub>, (e-f) HfO<sub>2</sub>, and (g-i) Al<sub>2</sub>O<sub>3</sub>/HfO<sub>2</sub> gate insulator. These data were for 40 different transistors.
